# Supplementary material for: Efficacy of dexamethasone combined with intravenous immunoglobulin for the treatment of pediatric autoimmune encephalitis
Source: Front Neurol. 2025 Mar 12;16:1512908. doi: 10.3389/fneur.2025.1512908 (PMC11936822; doi:10.3389/fneur.2025.1512908)
Supplement: Supplementary file 1 [file Data_Sheet_1.xlsx]

## Sheet: 病人名单
姓名	住院号	性别	年龄	主要诊断
非急性期组
曹才钧	1019917	男	2.4	NMDA脑炎
黄灿明	924388	男	1.5	自身免疫性脑炎(抗NMDA型抗体IgG阳性)
KINH THIEN BAO	1093209	男	7.4	抗NMDA受体脑炎
周子濠	1170822	男	7	自身免疫性脑炎
林嘉敏	847518	女	11.5	自身免疫性脑炎(（抗NMDA型抗体IgG阳性）)
刘濠荣	1182593	男	12.3	抗NMDA受体脑炎
韩漫雨	1244706	女	5	抗NMDA受体脑炎
黎信荣	1107194	男	8.4	自身免疫性脑炎（抗NMDAR脑炎）
陈宇轩	818455	男	6.1	自身免疫性脑炎（抗NMDA受体抗体阳性）丙球4g
张诗诗	940242	女	12.1	自身免疫性脑炎(抗谷氨酸脱羧酶2抗体阳性)
林宇钊	586007	男	4	自身免疫性脑炎 丙球4g
梁学谦	1230247	男	7.1	免疫相关性脑炎
余欣餐	891342	女	4.1	抗NMDA受体脑炎
钟淞名	920950	男	3.5	免疫相关性脑炎
朱永轩	1106929	男	12.5	自身免疫性脑炎(NMDA型抗体阳性)
李勇俊	1069253	男	10.4	抗NMDA受体脑炎
袁皓琳	1222813	女	7	免疫相关性脑炎（脑病）
周芷晴	827274	女	7.6	1、脑炎后遗症；2、自身免疫性脑炎（拔除胃管）
陈凯利	1199404	男	10.7	自身免疫性脑炎
王玉	1137806	女	4.8	1、自身免疫性脑炎(NMDA抗体阳性)；2、单纯疱疹病毒性脑膜炎后遗症期
刘昊	940066	男	7.5	1、NMDA免疫相关性脑炎2、病毒性脑炎后遗症
吴乐琪	926467	女	3.7	自身免疫性脑炎(外周血及脑脊液TBA法阳性)
罗雨晴	824634	女	3.2	抗NMDA受体脑炎
陈以恒	1141168	男	5.1	免疫相关性脑炎
张嘉雯	931824	女	7.7	自身免疫性脑炎(TBA法阳性)
杨文杰	1146770	男	9.11	自身免疫性脑炎
王紫萱	1185106	女	7.4	自身免疫性脑炎
李芯琪	842571	女	5.3	抗NMDA受体脑炎
巫宇辉	1190464	男	7.4	免疫相关枕叶脑炎
急性期组
张钰欣	1033237	男	4.11	抗NMDA受体脑炎
张梓杰	1222615	男	4.7	自身免疫性脑炎(NMDA阳性1:10)
钟晞潼	883751	女	5.2	抗NMDA受体脑炎
练彦希	1268397	男	2	自身免疫性脑炎
温冠霖	1259262	男	5.5	NMDA脑炎
梁妍瞳	895236	女	9.1	抗NMDA受体脑炎
梁鸣浩	820673	男	8	自身免疫性脑炎(NDMA型阳性)
潘浩熙	1042677	男	4.8	自身免疫性脑炎
林文斌	929301	男	8	免疫相关性脑炎
魏铭轩	833979	男	7.3	免疫相关性脑炎
谭成谦	1169841	男	9.8	免疫相关性脑炎
杨炯	1053462	男	6.9	抗NMDA受体脑炎
			6.76146
李文慧	1016592	女	4	1、脑炎（单疱病毒2型感染）2、MOG-lgG相关性脑炎
郑润权	1104438	男	5.5	MOG抗体脑炎
陈天宇	1197739	男	12.8	MOG抗体相关性脑炎
苏晓春	1130713	女	11.2	自身免疫性脑炎(脑干脑炎,AQP4抗体阳性)；
彭子航	924911	男	11.6	MOG抗体相关视神经脊髓炎谱系疾病
龙政军	872428	男	7.5	MOG抗体相关性脑炎
赖天乐	1085471	男	12.1	MOG抗体相关性脑脊髓炎
罗婉君	1260470	女	10.2	免疫性脑炎(MOG抗体阳性)
张桂烨	818135	男	2.8	免疫性脑炎(抗MOG抗体阳性（+）1:32)

## Sheet: 临床特征
性别	年龄	主要诊断	初始发病临床症状	发热	头痛头晕	视物不清	癫痫发作	癫痫持续状态	精神行为异常	运动障碍	不自主运动	语言障碍	吞咽障碍	认知障碍	意识水平下降	睡眠障碍	脾气暴躁	记忆力下降
非急性期组
男	2岁5岁	NMDA脑炎	发热、双下肢乏力	√					√	√	√	√					√
男	1岁6月	自身免疫性脑炎(抗NMDA型抗体IgG阳性)	抽搐、双下肢乏力				√		√	√	√	√	√	√	√	√	√
男	7岁5月	抗NMDA受体脑炎	头痛、情绪障碍		√		√		√	√		√				√	√
男	7岁	自身免疫性脑炎	运动障碍、语言减少						√	√		√
女	11岁6月	自身免疫性脑炎(（抗NMDA型抗体IgG阳性）)	抽搐				√		√	√	√		√				√
男	12岁3月	抗NMDA受体脑炎	抽搐		√		√		√	√		√		√	√	√	√	√
女	5岁	抗NMDA受体脑炎	抽搐				√		√	√	√	√	√	√	√	√	√
男	8岁5月	自身免疫性脑炎（抗NMDAR脑炎）	抽搐、失语				√	√	√	√	√	√	√
男	6岁1月	自身免疫性脑炎（抗NMDA受体抗体阳性）丙球4g	下肢疼痛
女	12岁1月	自身免疫性脑炎(抗谷氨酸脱羧酶2抗体阳性)	精神行为异常、						√			√		√		√	√
男	4岁	自身免疫性脑炎 丙球4g	发热、抽搐	√	√		√		√	√		√	√		√		√
男	7岁1月	免疫相关性脑炎	双下肢乏力						√	√	√	√					√
女	4岁1月	抗NMDA受体脑炎	发热、抽搐	√			√	√	√	√	√	√		√	√		√
男	3岁6月	免疫相关性脑炎	头痛、抽搐		√		√		√	√		√				√	√
男	12岁6月	自身免疫性脑炎(NMDA型抗体阳性)	头痛、行为异常	√	√				√		√			√	√		√	√
男	10岁5月	抗NMDA受体脑炎	走路不稳、脾气暴躁				√		√	√		√		√		√	√
女	7岁	免疫相关性脑炎（脑病）	发热、抽搐	√			√	√		√	√	√	√		√	√
女	7岁7月	1、脑炎后遗症；2、自身免疫性脑炎（拔除胃管）	发热	√			√		√	√	√	√	√	√	√
男	10岁8月	自身免疫性脑炎	发热、抽搐、嗜睡	√			√		√	√		√		√	√		√	√
女	4岁10月	1、自身免疫性脑炎(NMDA抗体阳性)；2、单纯疱疹病毒性脑膜炎后遗症期	发热、抽搐	√			√		√	√		√		√			√
男	7岁6月	1、NMDA免疫相关性脑炎2、病毒性脑炎后遗症	发热、抽搐	√	√		√		√	√	√	√		√			√
女	3岁8月	自身免疫性脑炎(外周血及脑脊液TBA法阳性)	发热、胡言乱语	√					√			√			√		√
女	3岁2月	抗NMDA受体脑炎	发热、不自主运动	√						√	√	√	√	√	√
男	5岁1月	免疫相关性脑炎	发热、抽搐	√			√	√	√
女	7岁8月	自身免疫性脑炎(TBA法阳性)	发热、头痛、抽搐	√	√		√				√
男	9岁11月	自身免疫性脑炎	发热、抽搐、精神行为异常	√			√		√	√		√				√	√
女	7岁5月	自身免疫性脑炎	发热、抽搐	√			√		√	√							√	√
女	5岁4月	抗NMDA受体脑炎	抽搐				√		√	√	√	√	√	√	√	√
男	7岁5月	免疫相关枕叶脑炎	视力下降			√	√		√	√				√			√
急性期组
男	4岁11月	抗NMDA受体脑炎	抽搐、不愿走路				√		√	√
男	4岁8月	自身免疫性脑炎(NMDA阳性1:10)	抽搐		√		√		√	√		√		√		√	√
女	5岁2月	抗NMDA受体脑炎	步态异常			√	√		√	√	√				√		√	√
男	2	自身免疫性脑炎	发热、抽搐	√			√			√		√					√
男	5岁6月	NMDA脑炎	发热、抽搐	√			√	√	√	√	√	√		√	√	√	√
女	9岁1月	抗NMDA受体脑炎	发热、抽搐	√	√		√		√	√	√						√
男	8岁	自身免疫性脑炎(NDMA型阳性)	抽搐、左侧肢体乏力		√	√	√		√	√
男	4岁8月	自身免疫性脑炎	发热、抽搐	√			√		√	√	√	√			√
男	8岁	免疫相关性脑炎	发热、抽搐	√			√		√								√	√
男	7岁4月	免疫相关性脑炎	嗜睡、注意力不集中、记忆力减退						√	√						√	√	√
男	9岁8月	免疫相关性脑炎	性格改变		√		√		√	√	√	√	√	√	√	√	√	√
男	6岁11月	抗NMDA受体脑炎	肢体不自主运动、抽搐				√			√	√	√	√	√		√	√

## Sheet: 辅助检查
性别	年龄	CSF白细胞	CSF蛋白	CSF抗体	静脉血抗体		头颅MR	EEG	肿瘤系列	B超或CT
非急性期组
男	2岁5岁	16	0.23	01:01:00	阴性		双侧额叶、顶叶及枕叶皮层下信号改变，考虑为脱髓鞘变性改变，小脑轻度萎缩	异常幼儿脑电图，背景变慢。	正常
男	1岁6月	3	0.6	01:10:00	01:10:00		正常	背景差，以3-5HZ慢波活动为主，6次局灶性发作	正常	正常
男	7岁5月	1	0.04	01:10:00	01:01:00		双侧侧脑室稍增宽，余头颅MRI增强扫描	清醒期全导弥漫性中高幅慢波为背景，见较多中高波幅δ和“西塔”波，双侧不对称，混有少量α波及少量β波	阴性	正常
男	7岁	9	0.25	阴性	阴性		正常	清醒期枕区生理节律慢化，前头部混合稍多量2-3Hz8慢波阵发。	正常	正常
女	11岁6月	9	0.41	01:30:00	01:30:00		正常	正常	阴性	正常
男	12岁3月	1	0.19	01:10:00	01:10:00		正常	异常清醒脑电图，背景活动慢（8-8.5 Hz）		右侧睾丸下部小囊样稍低密度影，未见明确强化，考虑良性灶，畸胎瘤
女	5岁	60	0.14	01:32:00	NMDA1:320		双侧顶叶、右侧额叶近脑室旁白质异常信号，考虑改良Fazekas法2级，建议结合临床。双侧侧脑室及第三脑室轻度扩张。脑萎缩。
男	8岁5月	16	0.478				发病时正常，后期轻度脑萎缩	监测到右侧额、中央、顶区起始部分性发作继发半侧阵挛发作1次，睡眠期左侧前、中颞区多量低-中波幅尖波、棘波发放，可波及到后颞区；	阴性	正常
男	6岁1月	10	0.175	01:10:00	01:10:00		正常	未知	阴性	正常	抗GABAB抗体 阳性（1:10）
女	12岁1月	1	0.21	GAD651:10	GAD651:10		双侧基底节、放射冠、内囊、外囊区、岛叶及双侧中脑大脑脚弥漫病变，考虑脑炎可能	1、背景差，未见枕区优势a节律；2、全导弥漫性满钵活动	阴性	正常	（MOG）阳性（+）1:10
男	4岁	0	0.09	阴性	阴性		右侧颞叶、双侧枕叶、双侧放射冠-半卵圆中心及左侧基底节区大片异常信号影	未见	阴性	正常
男	7岁1月	1	0.15	阴性	阴性		正常	正常	阴性	阴性
女	4岁1月	5	0.19	01:10:00	01:30:00		正常	睡眠期可见较多极高波幅棘慢波和极高波高波幅慢波活动爆发。	阴性	正常
男	3岁6月	17	1.42	阴性	阴性		正常	背景差，以2-4Hz慢波活动为主，双侧前头部为主广泛性棘慢波、多棘慢波。	正常	正常
男	12岁6月	35	0.32	01:32:00	01:32:00		正常	弥漫性慢波	阴性	正常
男	10岁5月	22	0.35	01:32:00	01:32:00		正常	中度异常脑电图（基本节律为中波幅5-7c/sTheta活动，记录中可中量散在阵发中-高幅3c/sDelta活动，两侧大致对称，枕部较明显）	阴性	阴性
女	7岁	5	3.53	阴性	阴性		脑桥、双侧背侧丘脑病变	未见	阴性	正常
女	7岁7月	23	0.57	阴性	阴性		左侧基底核及双侧颞顶叶皮质区多发异常信号，考虑脑炎可能	正常	阴性	正常
男	10岁8月	13	0.2	阴性	阴性		双侧海马异常信号	弥漫性慢波、频繁发作，多灶性起源(左右枕及后颞)
女	4岁10月	6	0.2	01:10:00	01:30:00		左侧额顶颞岛叶皮层下多发软化灶；双侧大脑半球皮层下多发水肿，左侧为著；脑萎缩。	背景活动稍落后，左右波幅不对称，左侧波幅低；睡眠周期分期不清；左侧额、中央、顶、额中线，右侧额、前颞、中颞部可见多量痫样放电。	阴性	正常
男	7岁6月	2	0.16				左侧放射冠异常信号影。	右中颞频发尖波、尖慢复合波	阴性	正常	南方医院神经系统自身免疫抗体检测（外周血、脑脊液）：小鼠大脑切片抗体检测：阳性；
女	3岁8月	25	1.13				正常	未见	阴性	正常	抗(DNER)抗体IgG（+）
女	3岁2月	0	0.535	01:30:00	NMDA1:1000		.双侧额叶皮层下区异常信号，脑室对称稍增大，脑池、脑沟增宽		阴性	右侧卵巢囊肿(剥除术后)
男	5岁1月	15	0.4	阴性	阴性		左侧大脑半球、右侧题叶、双侧海马区、双侧基底节区、双侧大脑脚区和桥脑广泛性病变	双侧大脑皮层广泛弥漫性失节律慢波，以1-2次/秒的慢波中低波为主，可见棘慢波、尖波。阵幅整合脑电图:背景活动为弥漫性节律素乱中低波幅慢波，无睡眠觉醒周期	阴性	正常
女	7岁8月	18	0.31				左侧额叶皮层及皮层下多发片状异常信号影，考虑自身免疫性脑炎可能性大	清醒期额、中央区偶见中等波幅尖波，睡眠期各导阵发稍多高或极高波幅尖慢波、棘慢波，部分呈节律短程发放，左侧额区明显。			南方医院神经系统自身免疫抗体检测（外周血、脑脊液）：小鼠大脑切片抗体检测：阳性；
男	9岁11月	16	0.5	阴性	阴性		左侧顶叶皮层小片状异常信号，局灶性脑皮质发育不良？与低级别胶质细胞瘤鉴别	1.同年龄组异常脑电图，2.背景活动异常，3.电发作	正常	正常
女	7岁5月	1	0.33	阴性	阴性		右侧壳核前部、尾状核头肿胀伴异常信号	清醒背景稍偏慢，睡眠背景欠佳；睡眠期可见额中央区及其中线少量棘波、棘慢波发放。	正常	正常	脑脊液寡克隆阳性
女	5岁4月	2	0.18	01:30:00	01:32:00		双侧额叶及右顶叶皮层下多发点片状异常信号；	背景活动 各导显示3-4.5Hz 20-90uV弥漫性慢波活动为主，双侧枕区未见优势节律	阴性	正常
男	7岁5月	3	0.37	阴性	阴性	双侧枕叶、顶叶皮层及皮层下多发异常信号，DWI部分弥散收受限，脑室系统轻度扩大		阴性	正常
急性期组
女	4岁11月	42	0.22	01:01:00	阴性		正常	双侧对称同步的高波幅3.1hz慢波，右侧颞区见棘慢波。	正常	正常
男	4岁8月	19	0.19	01:10:00	01:10:00		正常	睡眠期可见右侧中央区域阵发少量中高波幅棘波、棘慢波活动	阴性	阴性
女	5岁2月	21	0.31	NMDA1:100	NMDA1:100		正常	正常	阴性	正常
男	2	5	0.17	阴性	阴性		双侧基底节及双侧额叶异常信号	弥漫性慢波	正常	正常
男	5岁6月	4	0.22	01:10:00	01:10:00		正常	弥漫性慢波	正常	正常
女	9岁1月	48	0.25	01:10:00	01:10:00		正常	异常	阴性	正常
男	8岁	21	0.14	01:10:00	阴性		正常	右侧顶枕区低至中等波幅欠规则形慢活动增多，可见于清醒及睡眠各期，清醒期稍明显；未见癫痫放电波形；临床发作性事件：未见。	正常	正常	血清 抗CASPR-2抗体阳性1:300
男	4岁8月	18	0.24	阴性	阴性		正常	异常波同背景波，偶见1.7-1.8c/s极高波幅活动，持续约2-3s	阴性	正常
男	8岁	64	0.12	阴性	阴性		正常	清醒期全导较多高波幅慢波短程发放，睡眠期左侧导联阵发稍多中高波幅尖波、尖慢波，颞区明显。	阴性	阴性
男	7岁4月	4	0.31	阴性	阴性		下丘脑、背侧丘脑内侧及左侧岛叶多发异常信号，符合自身免疫脑炎。右侧顶叶局灶性脑萎缩。	异常	阴性	阴性
男	6岁11月	6	0.2			双侧侧脑室前角及体部旁白质、双侧基底节区、双侧岛叶、双侧颞叶内侧异常信号，可符合自身免疫性脑炎。	异常儿童脑电图（背景活动慢）。	阴性	正常		排除，信息不全
男	9岁8月	6	0.33	阴性	阴性	左侧大脑半球（侧脑室旁白质、基底节区及颞叶）、右侧颞岛叶、双侧小脑半球及脑干多发肿胀伴信号异常		正常	正常

## Sheet: 淋巴细胞亚群
性别	主要诊断	治疗前	T细胞(CD3+)	B细胞(CD3-CD19+)	NK细胞(CD3-(CD16+CD56)+)	CD4+T细胞/淋巴细胞(CD3+CD4+)	CD8+T细胞/淋巴细胞(CD3+CD8+)	CD4+T细胞/CD8+T细胞(CD4/CD8)	CD3+CD56+细胞(CIK)(CD3+CD56+)	CD20+B细胞/淋巴细胞(CD20+)	治疗后	T细胞(CD3+)	B细胞(CD3-CD19+)	NK细胞(CD3-(CD16+CD56)+)	CD4+T细胞/淋巴细胞(CD3+CD4+)	CD8+T细胞/淋巴细胞(CD3+CD8+)	CD4+T细胞/CD8+T细胞(CD4/CD8)	CD3+CD56+细胞(CIK)(CD3+CD56+)	CD20+B细胞/淋巴细胞(CD20+)
			60.00－76.00	13.00－27.00	4.00－17.00	31.00－47.00	18.00－35.00	0.71－2.78		6.30－18.00		60.00－76.00	13.00－27.00	4.00－17.00	31.00－47.00	18.00－35.00	0.71－2.78		6.30－18.00
男	NMDA脑炎		60.7	21.5	15.0	13.5	33.4	0.40	0.8	18.3		79.1	14.0	6.2	26.6	43.7	0.61	0.4	14.3
男	自身免疫性脑炎(抗NMDA型抗体IgG阳性)		57.67	30.11	9.11	23.32	31.24	0.75	0.5	32.09		61.2	25.13	12.1	39.93	45.13	0.88	0.65	26.11
男	抗NMDA受体脑炎		49.10	26.60	24.20	16.20	27.80	0.58	0.70	22.54		61.40	19.00	18.90	19.50	37.00	0.53	0.70	20.01
男	自身免疫性脑炎		58.09	31.94	9.72	25.96	25.26	1.03	0.22	32.07		66.37	22.70	8.33	27.69	32.43	0.85	1.10	22.83
女	自身免疫性脑炎(（抗NMDA型抗体IgG阳性）)		70.92	19.75	8.02	35.58	28.62	1.24	1.43	19.75		78.61	10.92	10.48	41.43	31.97	1.30	0.34	10.03
男	抗NMDA受体脑炎		55.57	32.79	10.47	22.11	30.68	0.72	0.61	28.25		87.53	4.00	8.51	37.75	45.78	0.82	0.61	3.14
女	抗NMDA受体脑炎		66.38	30.5	2.69	34.22	27.2	1.26	0.5	30.7		69.56	22.21	9.56	42.95	36.43	1.18	0.27	23.11
男	自身免疫性脑炎（抗NMDAR脑炎）		48.50	40.30	11.10	23.60	20.50	1.15	1.60	40.11		58.60	23.40	17.30	27.70	27.10	1.02	2.00	18.85
男	自身免疫性脑炎（抗NMDA受体抗体阳性）丙球4g		52.17	29.30	16.32	21.04	20.33	1.03	0.30	29.26		70.93	14.39	14.30	36.33	25.32	1.43	0.03	14.21
女	自身免疫性脑炎(抗谷氨酸脱羧酶2抗体阳性)		56.96	28.80	14.08	23.24	24.05	0.97	0.17	28.36		58.38	21.96	19.36	20.28	29.62	0.68	0.69	21.86
男	自身免疫性脑炎 丙球4g		84.90	10.40	3.70	39.90	35.60	1.12	0.40	8.52		90.10	3.50	5.40	36.30	40.10	0.91	0.10	1.99
男	免疫相关性脑炎		51.48	32.11	19.23	19.23	24.14	0.8	0.44	31.27		72.24	10.12	16.45	28.68	31.85	0.9	0.89	9.96
女	抗NMDA受体脑炎		68.81	15.09	14.90	43.99	16.89	2.60	0.27	15.00		64.03	16.58	18.27	39.06	16.91	2.31	0.43	16.74
男	免疫相关性脑炎		66.98	29.89	2.78	36.35	25.69	1.41	0.74	30.66		78.20	14.76	5.40	47.43	23.99	1.98	0.49	14.83
男	自身免疫性脑炎(NMDA型抗体阳性)		62.80	32.90	3.40	25.00	28.90	0.87	0.40	32.58		65.00	30.60	3.30	29.20	29.30	1.00	0.80	31.66
男	抗NMDA受体脑炎		61.3	28.6	7.0	22.4	32.8	0.68	0.7	25.9		62.4	27.3	9.4	22.0	35.3	0.62	0.6	26.3
女	免疫相关性脑炎（脑病）		66.84	20.5	11.07	32.39	26.02	1.24	2.13	19.71		71.68	15.74	12.24	35.66	28.12	1.27	0.32	16.02
女	1、脑炎后遗症；2、自身免疫性脑炎（拔除胃管）		85.01	8.52	4.23	35.39	39.01	0.91	1.51	8.19		90.01	7.19	1.15	53.51	36.48	1.47	0.50	8.03
男	自身免疫性脑炎		71.18	21.62	6.32	28.00	35.75	0.78	0.55	21.56		75.37	17.92	5.98	30.08	37.55	0.80	0.66	17.92
男	MOG抗体相关性脑炎		79.01	14.85	5.10	34.90	40.50	0.86	1.11	14.31		76.35	14.97	7.62	31.87	38.86	0.82	3.13	14.17
女	1、自身免疫性脑炎(NMDA抗体阳性)；2、单纯疱疹病毒性脑膜炎后遗症期		72.56	12.55	14.62	35.45	28.50	1.24	0.83	13.12		80.62	6.46	11.70	41.34	31.38	1.32	1.05	6.33
男	1、免疫相关性脑炎(TBA抗体阳性)2、病毒性脑炎后遗症		75.70	16.46	6.61	43.04	25.19	1.71	0.60	15.77		73.78	16.23	9.04	39.85	25.73	1.55	1.30	14.96
女	抗NMDA受体脑炎		67.05	25.57	6.37	26.79	34.97	0.77	0.06	25.60		65.81	23.96	8.99	24.48	35.43	0.69	0.45	23.89
男	免疫相关性脑炎		49.45	33.1	12.11	22.34	28.65	0.78	1.46	31.3		64.97	25.06	7.8	36.01	35.17	1.31	1.75	24.13
女	自身免疫性脑炎(TBA法阳性)		68.78	18.12	11.94	28.43	32.08	0.89	3.85	18.05		76.50	17.41	5.15	29.68	38.35	0.77	1.53	17.31
女	自身免疫性脑炎		62.65	21.26	15.07	29.67	26.67	1.11	0.35	19.95		61.44	13.9	9.43	29.55	25.82	1.44	0.7	15.65
女	抗NMDA受体脑炎		58.23	31.16	11.53	23.21	28.22	0.82	0.75	32.02		62.76	20.13	12.15	42.26	45.34	0.93	0.55	21.04
男	抗NMDA受体脑炎		69.6	22.9	6	35.6	22.2	1.6	0.3	22.9		72.7	15.9	10.7	37.5	23.3	1.61	0.1	15.4
男	MOG抗体相关视神经脊髓炎谱系疾病		64.8	12.15	22.36	32.93	23.12	1.42	0.69	11.96		58.43	10.11	7.12	35.1	25.6	1.37	0.68	10.08
女	抗NMDA受体脑炎		57.34	33.88	7.36	28.87	22.76	1.27	0.44	30.05		61.76	29.34	7.59	30.95	23.96	1.29	0.90	29.01
男			43.84	43.37	11.47	22.97	14.73	1.56	0.2	42.38		66.77	25.13	6.92	43.5	17.6	2.47	0.14	25.03
男			36.25	62.07	0.7	12.7	18.31	0.69	0.17	62.17		50.47	44.01	3.77	18.38	23.5	0.78	0.27	43.97
男	自身免疫性脑炎(NDMA型阳性)		50.31	37.15	11.75	24.95	18.65	1.34	0.24	36.79		68.09	17.57	13.40	37.96	22.22	1.71	0.27	17.74
男	免疫性脑炎(抗MOG抗体阳性（+）1:32)		67.64	20.81	10.40	34.74	24.57	1.41	0.56	19.95		73.11	16.76	8.35	33.48	27.80	1.20	0.32	16.43
男	自身免疫性脑炎		53.7	40.7	4.8	18.8	24.7	0.76	0.3	40.7		73.3	22.0	3.8	26.7	34.9	0.77	0.6	21.6
男			76.99	16.80	5.84	48.96	20.20	2.42	1.19	16.84		73.18	17.96	7.70	44.02	21.86	2.01	3.30	18.13
男	免疫相关性脑炎		66.61	13.29	18.51	26.24	25.12	1.04	0.61	13.29		68.23	13.61	17.79	24.52	30.50	0.80	2.24	13.85
			56.454	31.797	10.7037	25.891	23.9567	1.092	0.714	31.65		66.8525	19.5525	9.84	34.959	30.7145	1.283	0.446667	19.8775
				13.5397	7.53738	7.51837	5.13184	0.360549	0.620183	13.5603			9.94944	3.43239	7.75835	9.00766	0.499512	0.284868	9.83147

## Sheet: mRS评分
性别	年龄	主要诊断	入院时	病情最严重时	第1次治疗后	最后1次随访时	地米+丙球次数	是否复发	复发时间	第1次住院时间（天）	随访时长（月）
男	2岁5岁	NMDA脑炎	5	5	3	2	5次	否		可勉强独立行走，仍存在语言障碍
男	1岁6月	自身免疫性脑炎(抗NMDA型抗体IgG阳性)	5	5	3	3	3次之后患儿可独坐，后换美罗华	否		23	18
男	7岁5月	抗NMDA受体脑炎	5	5	3	1	1次	否		29	36
男	7岁	自身免疫性脑炎	4	4	2	0	1次,1次后可以独立行走	否		16	18
男	3岁6月	免疫相关性脑炎	4	4	2	1	1次，1次后患儿可以走路，但还有抽搐等症状，换用美罗华	否		51	24
女	11岁6月	自身免疫性脑炎(（抗NMDA型抗体IgG阳性）)	2	5	1	0	2次	否		60	36
男	12岁6月	自身免疫性脑炎(NMDA型抗体阳性)	4	5	1	0	2次	否		32	36
男	12岁3月	抗NMDA受体脑炎	5	5	1	0	2次	否		37	28
男	10岁5月	抗NMDA受体脑炎	3	3	1	0	2次	否		29	36
男	9岁11月	自身免疫性脑炎	2	3	1	0	2次	否		12	26
女	7岁5月	自身免疫性脑炎	3	3	1	0	2次后症状明显好转	否		10	18
女	7岁	自身免疫性脑炎	5	5	4	3	2次后意识明显改善，肌张力改善，换用美罗华	否		31	12
女	7岁7月	1、自身免疫性脑炎（拔除胃管）	5	5	4	3	2次后意识状态、运动好转，后换用美罗华	否		51	24
男	10岁8月	自身免疫性脑炎	5	5	3	2	2次，2次后行为异常、抽搐明显好转，后换美罗华	否		61	15
女	5岁4月	抗NMDA受体脑炎	4	5	3	0	2次，经过2次丙球+地米有效果，后换用美罗华后治愈；外院经过3次甲强龙及丙球、血浆置换治疗后mRS评分仍然为4分。	否		30	40
女	5岁	抗NMDA受体脑炎	5	5	3	0	2次之后换美罗华	否		44	19
男	8岁5月	自身免疫性脑炎（抗NMDAR脑炎）	5	5	3	0	3次后可勉强独走	否		52	36
女	4岁10月	1、自身免疫性脑炎(NMDA抗体阳性)；2、单纯疱疹病毒性脑膜炎后遗症期	4	4	3	2	3次	否		22	24
男	7岁6月	1、NMDA免疫相关性脑炎2、病毒性脑炎后遗症	3	3	1	1	3次之后症状明显改善	否		13	24
男	6岁1月	自身免疫性脑炎（抗NMDA受体抗体阳性）丙球4g	4	4	3	2	3次	否		16	24
女	12岁1月	自身免疫性脑炎(抗谷氨酸脱羧酶2抗体阳性)	3	3	1	0	3次	否		9	24
女	3岁8月	自身免疫性脑炎(外周血及脑脊液TBA法阳性)	3	3	1	0	3次，第2次之后无症状	否		20	24
男	4岁	自身免疫性脑炎 丙球4g	5	5	3	1	3次，3次之后可以独走	否		13	12
女	3岁2月	抗NMDA受体脑炎	5	5	1	0	3次，1次后可走路，咿呀发音，3次后评分为1，后换用美罗华治愈	否		20	36
男	7岁1月	免疫相关性脑炎	3	4	2	1	3次，3次之后仍有情绪问题及少量不自主运动，换用美罗华	否		15	12
男	5岁1月	免疫相关性脑炎	5	5	3	3	3次，3次后可独走，换用美罗华运动语言均好转	否		60	24
女	7岁8月	自身免疫性脑炎(TBA法阳性)	2	2	1	1	3次之后换美罗华每月1次	否		31	24
女	4岁1月	抗NMDA受体脑炎	3	5	2	1	3次，后换用美罗华	否			36
男	7岁5月	免疫相关枕叶脑炎	3	5	2	1	3次后可跑步，	否	3次丙球地米后4个月	反复复发3次，后换用美罗华序贯治疗
男	4岁8月	自身免疫性脑炎(NMDA阳性1:10)	3	4	0	0	1次	否		20	18
女	5岁2月	抗NMDA受体脑炎	3	4	3	1	1次治疗无效，换用美罗华	否		23	36
男	4岁11月	抗NMDA受体脑炎	4	4	0	0	1次，第1次后完全无症状	否		治愈
男	5岁6月	NMDA脑炎	3	4	2	1	2次后明显好转，评分2分，后换用美罗华	否		50	12
女	9岁1月	抗NMDA受体脑炎	2	3	1	0	2次，患儿症状未彻底好转换用美罗华治愈	否		16	24
男	8岁	自身免疫性脑炎(NDMA型阳性)	3	4	0	0	4次，第2次后就完全无症状了	否		40	36
男	4岁8月	自身免疫性脑炎	5	5	1	1	3次，2次之后基本正常	否		31	25
男	8岁	免疫相关性脑炎	3	3	2	1	3次,2次之后症状明显好转，但有反复抽搐，美罗华过敏	否		22	30
男	9岁8月	免疫相关性脑炎	3	5	3	3	2次，2次后可以独走，生活自理	是	出院后20天第1次复发	重度残疾，反复复发，丙球地米有效，但维持时间不长，换用美罗华效果不佳，后因新冠肺炎病情彻底恶化
男	6岁11月	抗NMDA受体脑炎	5	5	3	2	2次	否		治疗效果差
男	2	免疫相关性脑炎	3	3	1	0	2次，第一次后评分1分，第二次后痊愈	否		16	12
男	7岁4月	免疫相关性脑炎	3	3	2	1	3次，3次之后记忆力及计算能力仍偏差，换用美罗华	否		38	24
			3.7561	4.19512	1.95122	0.926829
			1.04356	0.889492	1.09433	1.03417

## Sheet: 丙球使用轮数
		入院时mRS	病情最严重时	地米治疗后mRS	最后1次随访后mRS	我院地米使用次数	是否美罗华
男	7岁5月	5	5	2	1	1次	否
男	7岁	4	4	1	0	1次	否
男	3岁6月	4	4	2	1	1次，1次后患儿可以走路，但还有抽搐等症状，换用美罗华	是
男	4岁11月	4	4	0	0	1次，第1次后完全无症状	否
男	4岁8月	3	4	0	0	1次	否
女	5岁2月	3	4	3	1	1次治疗无效，换用美罗华	是
		3.83333	4.16667	1.33333	0.5
		0.752773	0.408248	1.21106	0.547723
男	9岁11月	2	3	1	0	2次	否
女	11岁6月	2	5	1	0	2次	否
男	1岁6月	5	5	4	2	3次之后患儿可独坐，后换美罗华
男	12岁3月	5	5	1	0	2次	否
女	5岁	5	5	3	1	2次之后换美罗华	是
男	12岁6月	4	5	1	0	2次	否
男	10岁5月	3	3	1	0	2次	否
女	7岁	5	5	4	2	2次后意识明显改善，肌张力改善，换用美罗华	是
女	7岁7月	5	5	4	3	2次后意识状态、运动好转，后换用美罗华	是
女	7岁5月	3	3	1	0	2次后症状明显好转	否
女	5岁4月	4	5	3	0	2次，经过2次丙球+地米有效果，后换用美罗华后治愈；外院经过3次甲强龙及丙球、血浆置换治疗后mRS评分仍然为4分。	是
男	10岁8月	5	5	3	2	2次，2次后行为异常、抽搐明显好转，后换美罗华	是
女	9岁1月	2	3	1	0	2次，患儿症状未彻底好转换用美罗华治愈	是
男	2	3	3	0	0	2次，第一次后评分1分，第二次后痊愈	否
男	5岁6月	3	4	2	1	2次后明显好转，评分2分，后换用美罗华	是
男	8岁	3	4	0	0	2次，第2次后就完全无症状了	否
男	9岁8月	3	5	2	5	2次，重度残疾，反复复发，丙球地米有效，但维持时间不长，换用美罗华效果	是
男	6岁11月	5	5	3	2	2次
		3.72222	4.33333	1.94444	1
		1.17851	0.930949	1.34917	1.41421
男	8岁5月	5	5	3	0	3次后可勉强独走	否
男	6岁1月	4	4	3	2	3次	否
女	12岁1月	3	3	1	0	3次	否
女	7岁8月	2	2	1	1	3次之后换美罗华每月1次	是
男	4岁	5	5	3	1	3次，3次之后可以独走	否
男	7岁1月	3	4	2	1	3次，3次之后仍有情绪问题及少量不自主运动，换用美罗华	是
女	4岁1月	3	5	2	1	3次，后换用美罗华	是
女	4岁10月	4	4	3	2	3次	否
男	7岁6月	3	3	1	1	3次之后症状明显改善	否
女	3岁8月	3	3	1	0	3次，第2次之后无症状	否
女	3岁2月	5	5	1	0	3次，1次后可走路，咿呀发音，3次后评分为1，后换用美罗华治愈	是
男	5岁1月	5	5	3	3	3次，3次后可独走，换用美罗华运动语言均好转	是
男	7岁5月	3	5	2	1	3次后可跑步，	3次丙球地米后4个月
男	4岁8月	5	5	1	1	3次，2次之后基本正常	否
男	8岁	3	3	2	1	3次,2次之后症状明显好转，但有反复抽搐，美罗华过敏	是
男	7岁4月	3	3	2	1	3次，3次之后记忆力及计算能力仍偏差，换用美罗华	是
		3.6875	4	1.9375	1
		1.01448	1.0328	0.853913	0.790569
男	2岁5岁	5	5	4	3	4次
